# Supplementary material for: Gastrointestinal cell injury and perceived symptoms after running the Boston Marathon
Source: Frontiers journal article supplement (doi:10.3389/fphys.2023.1268306), 2023-10-16
Supplement: Table_1.pdf [file Table_1.pdf]

**Supplemental Table 1. GI Responses and risk factors present for each subject ranked in order starting with greatest %ICI decrease from post- to 24-hours post-race.**

|    | I-FABP (pg/ml) |         |        | GI Symptoms |      |        | Risk Factors Present |     |    |     |       |     |             |            |              |        | # Risk Factors |
|----|----------------|---------|--------|-------------|------|--------|----------------------|-----|----|-----|-------|-----|-------------|------------|--------------|--------|----------------|
|    | %ICI           | Post    | 24 hrs | Pre         | Post | 24 hrs | Alcohol Mon.         | EH1 | Rx | OTC | Supp. | Ill | NSAIDs Post | Sleep Post | Water during | Travel |                |
| 1  | -90.0          | 4300.1  | 429.6  |             | ✓    | ✓      |                      |     |    |     |       | ✓   |             |            |              | ✓      | 2              |
| 2  | -88.5          | 9183.8  | 1058.1 |             | ✓    | ✓      | ✓                    |     |    | ✓   | ✓     |     |             |            |              | ✓      | 4              |
| 3  | -86.7          | 14086.6 | 1878.1 | ✓           | ✓    | ✓      | ✓                    |     | ✓  |     | ✓     |     | ✓           |            |              |        | 4              |
| 4  | -84.4          | 4070.8  | 635.1  | ✓           | ✓    | ✓      |                      |     |    |     |       |     | ✓           |            |              | ✓      | 2              |
| 5  | -84.4          | 4765.4  | 743.7  |             | ✓    | ✓      |                      |     |    |     | ✓     |     |             | ✓          |              | ✓      | 3              |
| 6  | -77.6          | 3714.4  | 832.6  |             | ✓    | ✓      |                      |     |    |     |       |     |             |            |              | ✓      | 1              |
| 7  | -69.5          | 6209.4  | 1895.6 | ✓           | ✓    | ✓      | ✓                    |     |    |     | ✓     |     | ✓           |            |              | ✓      | 4              |
| 8  | -66.7          | 6548.4  | 2182.8 | ✓           | ✓    | ✓      | ✓                    |     | ✓  | ✓   | ✓     |     |             | ✓          | ✓            | ✓      | 7              |
| 9  | -66.6          | 3122.6  | 1041.9 |             | ✓    | ✓      | ✓                    |     |    |     | ✓     |     |             |            |              | ✓      | 3              |
| 10 | -62.8          | 3053.8  | 1136.9 | ✓           | ✓    | ✓      | ✓                    |     |    |     | ✓     |     |             |            |              | ✓      | 3              |
| 11 | -62.7          | 3924.7  | 1465.3 | ✓           |      | ✓      | ✓                    | ✓   |    |     | ✓     |     |             |            |              |        | 3              |
| 12 | -59.1          | 2068.1  | 845.5  |             | ✓    | ✓      | ✓                    |     |    |     |       |     |             |            |              | ✓      | 2              |
| 13 | -57.9          | 5868.6  | 2468.8 |             |      |        | ✓                    |     | ✓  |     |       |     |             | ✓          |              | ✓      | 4              |
| 14 | -51.6          | 2057.0  | 995.4  | ✓           | ✓    | ✓      |                      | ✓   | ✓  | ✓   | ✓     |     | ✓           |            |              | ✓      | 6              |
| 15 | -51.3          | 1669.0  | 813.7  | ✓           | ✓    | ✓      | ✓                    |     | ✓  |     | ✓     |     |             |            | ✓            | ✓      | 5              |
| 16 | -50.0          | 2484.6  | 1243.5 |             | ✓    | ✓      | ✓                    |     |    |     | ✓     |     |             |            |              | ✓      | 3              |
| 17 | -49.9          | 9347.2  | 4680.3 | ✓           | ✓    | ✓      |                      |     | ✓  |     | ✓     |     |             |            |              |        | 2              |
| 18 | -45.7          | 2123.6  | 1154.0 |             | ✓    | ✓      | ✓                    |     |    |     | ✓     |     |             |            |              | ✓      | 3              |
| 19 | -44.4          | 2250.3  | 1252.1 |             | ✓    | ✓      |                      |     |    |     | ✓     |     |             |            |              | ✓      | 2              |
| 20 | -44.3          | 2698.8  | 1503.6 |             | ✓    | ✓      | ✓                    |     |    |     | ✓     |     |             |            |              | ✓      | 3              |
| 21 | -43.8          | 3825.9  | 2152.2 | ✓           | ✓    | ✓      |                      | ✓   | ✓  |     | ✓     | ✓   |             | ✓          |              | ✓      | 6              |
| 22 | -40.2          | 1400.9  | 837.3  |             | ✓    | ✓      |                      |     |    |     | ✓     |     |             |            |              | ✓      | 2              |
| 23 | -39.1          | 2853.9  | 1739.4 |             | ✓    | ✓      | ✓                    |     |    |     |       |     |             |            |              | ✓      | 2              |
| 24 | -36.9          | 2227.0  | 1405.1 |             | ✓    | ✓      | ✓                    |     |    |     | ✓     | ✓   |             |            |              | ✓      | 4              |
| 25 | -36.1          | 2394.4  | 1529.5 | ✓           | ✓    | ✓      |                      |     |    |     |       |     | ✓           |            |              | ✓      | 2              |
| 26 | -31.9          | 1885.0  | 1284.5 |             | ✓    | ✓      | ✓                    |     |    |     | ✓     | ✓   |             |            |              | ✓      | 4              |

Supplemental Table 1 Continued

|    | I-FABP (pg/ml) |        |        | GI Symptoms |      |        | Risk Factors Present |     |    |     |       |     |             |            |              |        | # Risk Factors |
|----|----------------|--------|--------|-------------|------|--------|----------------------|-----|----|-----|-------|-----|-------------|------------|--------------|--------|----------------|
|    | %ICI           | Post   | 24 hrs | Pre         | Post | 24 hrs | Alcohol Mon.         | EHI | Rx | OTC | Supp. | Ill | NSAIDs Post | Sleep Post | Water during | Travel |                |
| 27 | -27.4          | 1898.9 | 1378.7 | ✓           | ✓    | ✓      |                      |     |    |     | ✓     |     |             |            |              | ✓      | 2              |
| 28 | -25.6          | 3429.7 | 2552.5 | ✓           | ✓    | ✓      | ✓                    |     |    | ✓   | ✓     |     |             |            |              | ✓      | 4              |
| 29 | -20.6          | 1390.0 | 1103.9 | ✓           | ✓    | ✓      | ✓                    | ✓   | ✓  |     | ✓     | ✓   |             | ✓          |              | ✓      | 7              |
| 30 | -11.6          | 2092.0 | 1849.1 |             | ✓    | ✓      | ✓                    | ✓   |    |     |       |     |             |            |              |        | 2              |
| 31 | -7.1           | 1664.8 | 1547.1 | ✓           | ✓    | ✓      | ✓                    | ✓   | ✓  |     | ✓     |     |             |            |              | ✓      | 5              |
| 32 | 0.1            | 2505.3 | 2507.4 |             | ✓    | ✓      | ✓                    |     |    |     |       |     |             |            |              | ✓      | 2              |
| 33 | 6.4            | 1251.2 | 1331.5 | ✓           | ✓    | ✓      | ✓                    |     |    |     | ✓     |     |             |            |              |        | 2              |
| 34 | 10.4           | 1169.0 | 1291.0 | ✓           | ✓    | ✓      |                      | ✓   |    |     | ✓     |     |             | ✓          |              | ✓      | 4              |
| 35 | 12.4           | 1192.6 | 1340.5 | ✓           | ✓    | ✓      | ✓                    |     |    |     |       |     | ✓           |            |              | ✓      | 3              |
| 36 | 16.7           | 1782.2 | 2080.5 | ✓           | ✓    | ✓      |                      |     |    | ✓   | ✓     |     | ✓           | ✓          |              | ✓      | 5              |
| 37 | 17.0           | 3175.3 | 3716.0 | ✓           | ✓    | ✓      | ✓                    |     |    |     | ✓     |     |             | ✓          |              |        | 3              |
| 38 | 58.6           | 964.1  | 1529.2 |             | ✓    | ✓      | ✓                    | ✓   | ✓  |     | ✓     |     | ✓           |            |              | ✓      | 6              |
| 39 | 68.5           | 2807.3 | 4729.5 |             | ✓    | ✓      | ✓                    |     | ✓  | ✓   | ✓     |     |             | ✓          |              | ✓      | 6              |
| 40 | 71.3           | 1243.6 | 2129.9 | ✓           | ✓    | ✓      | ✓                    |     |    |     | ✓     |     |             |            |              | ✓      | 3              |

**Abbreviations:** %ICI = percent change from post- to 24-hours post-race gastrointestinal permeability; I-FABP = intestinal fatty acid binding protein; GI = gastrointestinal; h = hour; Mon. = Monday; EHI = exertional heat illness; Rx = prescription medication; OTC = over-the-counter medication; NSAIDs = non-steroidal anti-inflammatory drugs; Supp. = supplement

**Notes:** A "✓" indicates the presence of GI symptoms reported at each time point OR if the participant reported a risk factor that could potentially impact their recovery from post- to 24 h post-race. Previous history of EHI included previous history of any exertional heat illness, exertional heat exhaustion, and exertional heat stroke; prescription and OTC medications and supplement use included reports of any medication or supplements; illness refers to reported current illness <5 days before the race; sleep since post-race was ✓ if they reported sleeping <5 hours or rated their sleep as "below average"; if they did not consume water during the race; and if they traveled to the race. Total number of risk factors present by subject is in the "# Risk Factors" column.
